# Supplementary material for: Goldilocks Dilemma: LPS Works Both as the Initial Target and a Barrier for the Antimicrobial Action of Cationic AMPs on E. coli
Source: MDPI journal article supplement (doi:10.3390/biom13071155), 2023-07-20
Supplement: s1 [file s1]

Supplementary material for:

## Goldilocks Dilemma: LPS Works Both as the Initial Target and a Barrier for the Antimicrobial Action of Cationic AMPs on *E. coli*

Martin Jakubec <sup>1,\*</sup>, Fredrik G. Rylandsholm <sup>1</sup>, Philip Rainsford <sup>1</sup>, Mitchell Silk <sup>1</sup>, Maxim Bril'kov <sup>2</sup>, Tone Kristoffersen <sup>1</sup>, Eric Juskewitz <sup>3</sup>, Johanna U. Ericson <sup>3</sup> and John Sigurd M. Svendsen <sup>1</sup>

<sup>1</sup> Department of Chemistry, Faculty of Science and Technology, UiT the Arctic University of Norway, 9019 Tromsø, Norway; fredrik.g.rylandsholm@uit.no (F.G.R.); philip.rainsford@uit.no (P.R.); tone.kristoffersen@uit.no (T.K.); john-sigurd.svendsen@uit.no (J.S.M.S.)

<sup>2</sup> Department of Pharmacy, Faculty of Health Sciences, UiT the Arctic University of Norway, 9019 Tromsø, Norway; maxim.bril'kov@uit.no

<sup>3</sup> Department of Medical Biology, Faculty of Health Sciences, UiT the Arctic University of Norway, 9019 Tromsø, Norway; johanna.e.sollid@uit.no (J.U.E.)

\* Correspondence: martin.jakubec@uit.no

### Peptide chemical analysis

The crude cyclic peptides were purified by preparative reverse phase-HPLC using gradients from 15 to 40 % buffer B (buffer A: water/0.1% TFA, buffer B: acetonitrile/0.1% TFA) over 50 minutes (11 ml/min flow rate). c(LWwNKR) was isolated as a white fluffy solid. **HRMS** (ESI): Calculated for:  $C_{44}H_{62}N_{13}O_7^+$  [M+H]<sup>+</sup> 884.4890; found; 884.4885. c(WWWRRR) was isolated as a white solid. **HRMS** (ESI): Calculated for:  $C_{51}H_{68}N_{18}O_6^{2+}$  [M+H]<sup>2+</sup> 514.2779; found; 514.2775. c(WRWRWR) was isolated as a white solid. **HRMS** (ESI): Calculated for:  $C_{51}H_{68}N_{18}O_6^{2+}$  [M+H]<sup>2+</sup> 514.2779; found; 514.2773. c(WWWKKK) was isolated as a white solid. **HRMS** (ESI): Calculated for:  $C_{51}H_{68}N_{12}O_6^{2+}$  [M+H]<sup>2+</sup> 472.2687; found; 472.2682. c(WKWKWK) was isolated as a white solid. **HRMS** (ESI): Calculated for:  $C_{51}H_{68}N_{12}O_6^{2+}$  [M+H]<sup>2+</sup> 472.2687; found; 472.2681.

**Table S1:**  $K_p$  and  $k_{off}$  from Figure 2.

| AMP    | $K_p$     |            |              | $k_{off}$ (s <sup>-1</sup> ) |             |             |
|--------|-----------|------------|--------------|------------------------------|-------------|-------------|
|        | DMPC      | DMPC:PG    | DMPC:LPS     | DMPC                         | DMPC:PG     | DMPC:LPS    |
| LWwNKR | 278 ± 8   | 401 ± 19   | 1145 ± 99    | 1.76 ± 0.12                  | 1.75 ± 0.16 | 1.01 ± 0.18 |
| WKWKWK | 531 ± 10  | 630 ± 33   | 1191 ± 166   | 0.90 ± 0.24                  | 1.32 ± 0.05 | 0.95 ± 0.12 |
| WRWRWR | 1299 ± 94 | 3160 ± 15  | 4520 ± 215   | 0.87 ± 0.19                  | 0.48 ± 0.05 | 0.70 ± 0.16 |
| WWWKKK | 2534 ± 80 | 5156 ± 34  | 3943 ± 218   | 0.48 ± 0.07                  | 0.32 ± 0.05 | 0.60 ± 0.15 |
| WWWRRR | 6649 ± 80 | 12705 ± 16 | 17040 ± 1150 | 0.22 ± 0.02                  | 0.19 ± 0.01 | 0.25 ± 0.03 |

**Table S2:**  $\gamma_B/\gamma_F$ -1 ratios.

| AMP    | $\gamma_B/\gamma_F$ -1 |          |                                           |                              |                               |                                  |                          |
|--------|------------------------|----------|-------------------------------------------|------------------------------|-------------------------------|----------------------------------|--------------------------|
|        | DMPC                   | DMPC:LPS | <i>E. coli</i><br>ATCC<br>25922<br>lysate | <i>E. coli</i><br>ATCC 25922 | <i>E. coli</i><br>CCUG 70662- | <i>E. coli</i><br>CCUG<br>70662+ | <i>E. coli</i><br>NR 698 |
| LWwNKr | 7.830                  | 2.620    | 0.035                                     | 0.106                        | 5.202                         | 4.990                            | 0.186                    |
| WKWKWK | 7.127                  | 3.915    | 0.044                                     | 0.083                        | 0.170                         | 0.295                            | 0.180                    |
| WRWRWR | 2.900                  | 3.475    | 0.275                                     | 0.143                        | 0.549                         | 1.062                            | 3.059                    |
| WWWKKK | 0.297                  | 0.402    | 0.225                                     | 0.289                        | 0.317                         | 0.197                            | 0.370                    |
| WWWRRR | 0.247                  | 0.199    | 0.216                                     | 0.239                        | 0.473                         | 0.238                            | 0.819                    |

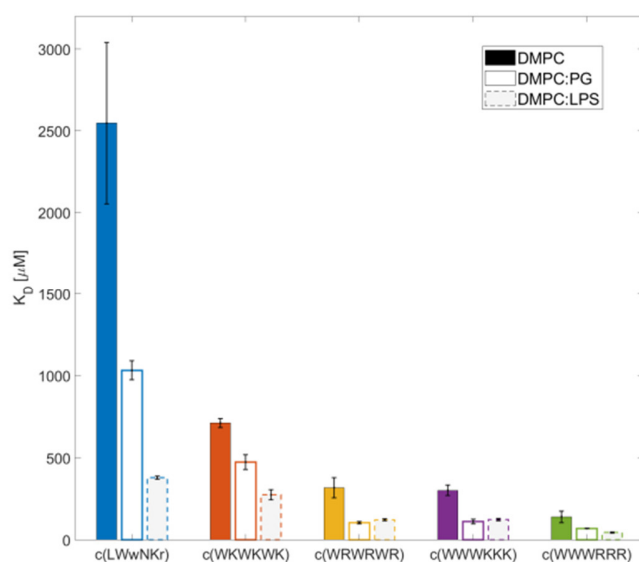

**Figure S1:**  $K_D$  extracted from steady state SPR analysis

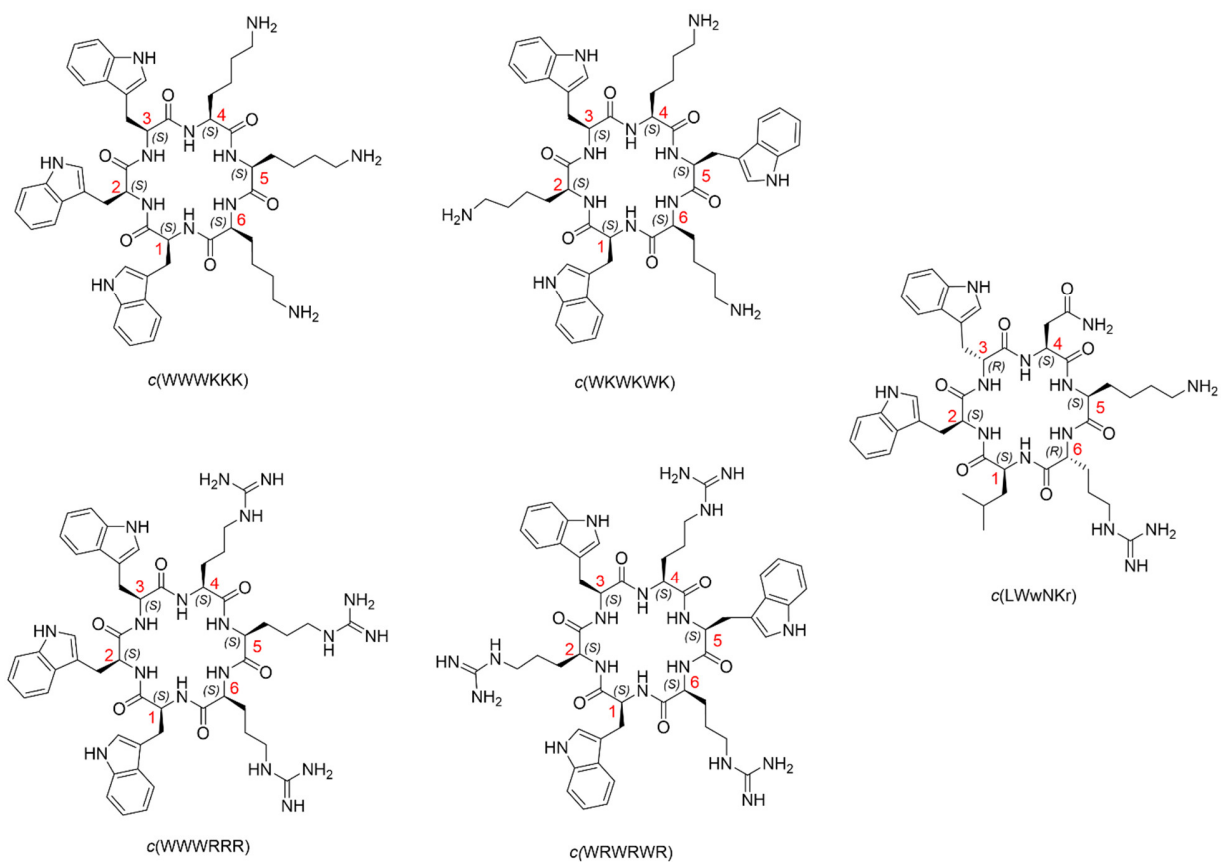

**Figure S2:** The five peptides with numbered amino acids for structure elucidation.

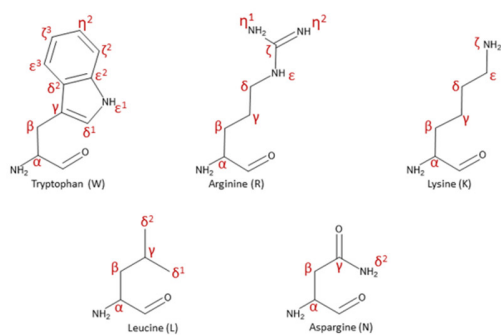

**Figure S3:** Labelled amino acids.

**Table S3:** Full assignment of c(WWWKKK) according to Figure S2

| c(WWWKKK) |                               |                             |        |          |           |              |            |            |            |              |           |          |           |              |
|-----------|-------------------------------|-----------------------------|--------|----------|-----------|--------------|------------|------------|------------|--------------|-----------|----------|-----------|--------------|
| Residue # | Amino acid                    | Chemical shift ( $\delta$ ) |        |          |           |              |            |            |            |              |           |          |           |              |
| 1         | W - Tryptophan                | NH $\alpha$                 | CO     | $\alpha$ | $\beta$   | $\epsilon$ 1 | $\delta$ 1 | $\gamma$   | $\delta$ 2 | $\epsilon$ 3 | $\zeta$ 3 | $\eta$ 2 | $\zeta$ 2 | $\epsilon$ 2 |
|           | $^1\text{H}$                  | 7.85                        | -      | 4.48     | 2.99/2.86 | 10.10        | 7.06       | -          | -          | 7.46         | 7.09      | 7.17     | 7.41      | -            |
|           | $^{13}\text{C}/^{15}\text{N}$ | 118.01                      | 173.41 | 54.70    | 26.00     | 129.28       | 124.45     | 108.96     | 127.01     | 118.48       | 119.41    | 122.04   | 111.98    | 136.34       |
| 2         | W - Tryptophan                | NH $\alpha$                 | CO     | $\alpha$ | $\beta$   | $\epsilon$ 1 | $\delta$ 1 | $\gamma$   | $\delta$ 2 | $\epsilon$ 3 | $\zeta$ 3 | $\eta$ 2 | $\zeta$ 2 | $\epsilon$ 2 |
|           | $^1\text{H}$                  | 7.33                        | -      | 4.51     | 3.11/2.87 | 10.05        | 6.95       | -          | -          | 7.30         | 7.05      | 7.15     | 7.39      | -            |
|           | $^{13}\text{C}/^{15}\text{N}$ | 119.00                      | 172.67 | 54.55    | 26.36     | 130.00       | 124.76     | 108.30     | 127.06     | 118.30       | 119.59    | 122.16   | 112.04    | 136.20       |
| 3         | W - Tryptophan                | NH $\alpha$                 | CO     | $\alpha$ | $\beta$   | $\epsilon$ 1 | $\delta$ 1 | $\gamma$   | $\delta$ 2 | $\epsilon$ 3 | $\zeta$ 3 | $\eta$ 2 | $\zeta$ 2 | $\epsilon$ 2 |
|           | $^1\text{H}$                  | 7.55                        | -      | 4.45     | 3.06/2.76 | 10.07        | 6.92       | -          | -          | 7.30         | 7.02      | 7.11     | 7.33      | -            |
|           | $^{13}\text{C}/^{15}\text{N}$ | 121.25                      | 172.67 | 55.19    | 26.06     | 129.56       | 124.19     | 108.54     | 126.86     | 118.30       | 119.44    | 122.05   | 111.94    | 136.24       |
| 4         | K -Lysine                     | NH $\alpha$                 | CO     | $\alpha$ | $\beta$   | $\gamma$     | $\delta$   | $\epsilon$ | $\zeta$    |              |           |          |           |              |
|           | $^1\text{H}$                  | 7.84                        | -      | 3.75     | 1.49/1.67 | 0.66         | 1.30/1.58  | 2.26       | 7.41       | -            | -         | -        | -         | -            |
|           | $^{13}\text{C}/^{15}\text{N}$ | 120.75                      | 173.08 | 54.90    | 30.07     | 21.86        | 26.19      | 39.24      | 96.51      | -            | -         | -        | -         | -            |
| 5         | K -Lysine                     | NH $\alpha$                 | CO     | $\alpha$ | $\beta$   | $\gamma$     | $\delta$   | $\epsilon$ | $\zeta$    |              |           |          |           |              |
|           | $^1\text{H}$                  | 8.03                        | -      | 4.10     | 1.51      | 1.68/1.50    | 1.32/1.24  | 2.88       | 7.46       | -            | -         | -        | -         | -            |
|           | $^{13}\text{C}/^{15}\text{N}$ | 119.47                      | 173.29 | 53.60    | 28.83     | 30.06        | 22.34      | 39.43      | 96.73      | -            | -         | -        | -         | -            |
| 6         | K -Lysine                     | NH $\alpha$                 | CO     | $\alpha$ | $\beta$   | $\gamma$     | $\delta$   | $\epsilon$ | $\zeta$    |              |           |          |           |              |
|           | $^1\text{H}$                  | 7.77                        | -      | 3.88     | 1.22      | 0.85/0.74    | 1.33       | 2.61       | 7.37       | -            | -         | -        | -         | -            |
|           | $^{13}\text{C}/^{15}\text{N}$ | 119.35                      | 173.76 | 54.55    | 29.43     | 21.86        | X          | 39.24      | 96.52      | -            | -         | -        | -         | -            |

**Table S4:** Full assignment of c(WKWKWK) according to Figure S2.

| c(WKWKWK) |                               |                             |        |          |         |              |            |            |              |              |           |          |           |              |
|-----------|-------------------------------|-----------------------------|--------|----------|---------|--------------|------------|------------|--------------|--------------|-----------|----------|-----------|--------------|
| Residue # | Amino acid                    | Chemical shift ( $\delta$ ) |        |          |         |              |            |            |              |              |           |          |           |              |
| 1         | W - Tryptophan                | NH $\alpha$                 | CO     | $\alpha$ | $\beta$ | $\epsilon$ 1 | $\delta$ 1 | $\gamma$   | $\delta$ 2   | $\epsilon$ 3 | $\zeta$ 3 | $\eta$ 2 | $\zeta$ 2 | $\epsilon$ 2 |
|           | $^1\text{H}$                  | 7.99                        | -      | 4.54     | 3.09    | 10.17        | 7.16       | -          | -            | 7.52         | 7.10      | 7.17     | 7.37      | -            |
|           | $^{13}\text{C}/^{15}\text{N}$ | 119.292                     | 173.01 | 54.66    | 25.99   | 129.67       | 124.35     | 108.77     | 127.06       | 118.37       | 119.46    | 122.03   | 112.04    | 136.21       |
| 2         | K - Lysine                    | NH $\alpha$                 | CO     | $\alpha$ | $\beta$ | $\gamma$     | $\delta$   | $\epsilon$ | $\zeta$      | -            | -         | -        | -         | -            |
|           | $^1\text{H}$                  | 7.62                        | -      | 3.89     | 1.42    | 0.67         | 1.28       | 2.55       | 7.35         | -            | -         | -        | -         | -            |
|           | $^{13}\text{C}/^{15}\text{N}$ | 120.24                      | 172.91 | 54.55    | 29.59   | 21.59        | 26.21      | 39.25      | 134.12/95.83 | -            | -         | -        | -         | -            |

**Table S5:** Full assignment of c(WRWRWR) according to Figure S2.

| c(WRWRWR) |                               |                             |        |          |         |              |            |            |            |              |           |          |           |              |
|-----------|-------------------------------|-----------------------------|--------|----------|---------|--------------|------------|------------|------------|--------------|-----------|----------|-----------|--------------|
| Residue # | Amino acid                    | Chemical shift ( $\delta$ ) |        |          |         |              |            |            |            |              |           |          |           |              |
| 1         | W - Tryptophan                | NH $\alpha$                 | CO     | $\alpha$ | $\beta$ | $\epsilon$ 1 | $\delta$ 1 | $\gamma$   | $\delta$ 2 | $\epsilon$ 3 | $\zeta$ 3 | $\eta$ 2 | $\zeta$ 2 | $\epsilon$ 2 |
|           | $^1\text{H}$                  | 8.07                        | -      | 4.54     | 3.13    | 10.13        | 7.16       | -          | -          | 7.53         | 7.10      | 7.16     | 7.37      | -            |
|           | $^{13}\text{C}/^{15}\text{N}$ | 119.43                      | 172.84 | 54.84    | 26.04   | 129.65       | 124.44     | 108.78     | 126.96     | 118.23       | 119.39    | 122.07   | 111.97    | 136.23       |
| 2         | R - Arginine                  | NH $\alpha$                 | CO     | $\alpha$ | $\beta$ | $\gamma$     | $\delta$   | $\epsilon$ | $\zeta$    | $\eta$ 1     | $\eta$ 2  | -        | -         | -            |
|           | $^1\text{H}$                  | 7.65                        | -      | 3.90     | 1.41    | 0.82         | 2.71       | 6.77       | -          | X            | X         | -        | -         | -            |
|           | $^{13}\text{C}/^{15}\text{N}$ | 119.96                      | 172.88 | 54.39    | 27.28   | 23.71        | 40.44      | 84.78      | 153.71     | X            | X         | -        | -         | -            |

**Table S6:** Full assignment of c(WWWRRR) according to Figure S2.

| c(WWWRRR) |                               |                             |        |          |           |              |            |            |            |              |           |          |           |              |
|-----------|-------------------------------|-----------------------------|--------|----------|-----------|--------------|------------|------------|------------|--------------|-----------|----------|-----------|--------------|
| Residue # | Amino acid                    | Chemical shift ( $\delta$ ) |        |          |           |              |            |            |            |              |           |          |           |              |
| 1         | W - Tryptophan                | NH $\alpha$                 | CO     | $\alpha$ | $\beta$   | $\epsilon$ 1 | $\delta$ 1 | $\gamma$   | $\delta$ 2 | $\epsilon$ 3 | $\zeta$ 3 | $\eta$ 2 | $\zeta$ 2 | $\epsilon$ 2 |
|           | $^1\text{H}$                  | 7.88                        | -      | 4.52     | 2.85/3.04 | 10.03        | 7.04       | -          | -          | 7.46         | 7.07      | 7.15     | 7.38      | -            |
|           | $^{13}\text{C}/^{15}\text{N}$ | 118.00                      | 173.20 | 54.68    | 26.04     | 129.05       | 124.44     | 109.20     | 126.79     | 118.31       | 119.29    | 122.02   | 111.89    | 136.27       |
| 2         | W - Tryptophan                | NH $\alpha$                 | CO     | $\alpha$ | $\beta$   | $\epsilon$ 1 | $\delta$ 1 | $\gamma$   | $\delta$ 2 | $\epsilon$ 3 | $\zeta$ 3 | $\eta$ 2 | $\zeta$ 2 | $\epsilon$ 2 |
|           | $^1\text{H}$                  | 7.42                        | -      | 4.54     | 2.98/3.03 | 10.05        | 7.02       | -          | -          | 7.38         | 7.08      | 7.16     | 7.40      | -            |
|           | $^{13}\text{C}/^{15}\text{N}$ | 119.05                      | 172.55 | 54.36    | 26.68     | 130.00       | 124.76     | 108.40     | 127.37     | 118.30       | 119.44    | 122.03   | 112.02    | 136.22       |
| 3         | W - Tryptophan                | NH $\alpha$                 | CO     | $\alpha$ | $\beta$   | $\epsilon$ 1 | $\delta$ 1 | $\gamma$   | $\delta$ 2 | $\epsilon$ 3 | $\zeta$ 3 | $\eta$ 2 | $\zeta$ 2 | $\epsilon$ 2 |
|           | $^1\text{H}$                  | 7.64                        | -      | 4.43     | 2.85/3.05 | 10.03        | 6.94       | -          | -          | 7.36         | 7.04      | 7.12     | 7.33      | -            |
|           | $^{13}\text{C}/^{15}\text{N}$ | 121.23                      | 173.10 | 55.49    | 26.04     | 129.50       | 124.27     | 108.40     | 126.82     | 118.17       | 119.34    | 122.03   | 111.87    | 136.23       |
| 4         | R - Arginine                  | NH $\alpha$                 | CO     | $\alpha$ | $\beta$   | $\gamma$     | $\delta$   | $\epsilon$ | $\zeta$    | $\eta$ 1     | $\eta$ 2  | -        | -         | -            |
|           | $^1\text{H}$                  | 7.94                        | -      | 3.72     | 1.58/1.50 | 0.74/0.87    | 2.75/2.73  | 6.77       | -          | X            | X         | -        | -         | -            |
|           | $^{13}\text{C}/^{15}\text{N}$ | 120.23                      | 172.89 | 54.85    | 26.37     | 24.11        | 40.38      | 85.03      | 156.63     | X            | X         | -        | -         | -            |
| 5         | R - Arginine                  | NH $\alpha$                 | CO     | $\alpha$ | $\beta$   | $\gamma$     | $\delta$   | $\epsilon$ | $\zeta$    | $\eta$ 1     | $\eta$ 2  | -        | -         | -            |
|           | $^1\text{H}$                  | 8.15                        | -      | 4.18     | 1.48/1.75 | 1.49         | 3.11       | 7.12       | -          | X            | X         | -        | -         | -            |
|           | $^{13}\text{C}/^{15}\text{N}$ | 119.02                      | 172.78 | 53.24    | 27.98     | 24.43        | 40.54      | 84.97      | 156.89     | X            | X         | -        | -         | -            |
| 6         | R - Arginine                  | NH $\alpha$                 | CO     | $\alpha$ | $\beta$   | $\gamma$     | $\delta$   | $\epsilon$ | $\zeta$    | $\eta$ 1     | $\eta$ 2  | -        | -         | -            |
|           | $^1\text{H}$                  | 7.87                        | -      | 3.85     | 1.29/1.24 | 0.85/0.93    | 2.78/2.72  | 6.80       | -          | X            | X         | -        | -         | -            |
|           | $^{13}\text{C}/^{15}\text{N}$ | 119.50                      | 173.54 | 54.83    | 27.01     | 23.76        | 40.21      | 84.97      | 156.57     | X            | X         | -        | -         | -            |

**Table S7:** Full assignment of c(LWwNKR) according to Figure S2.

| c(LWwNKR) |                    |                             |        |          |           |              |             |            |            |              |           |          |           |              |
|-----------|--------------------|-----------------------------|--------|----------|-----------|--------------|-------------|------------|------------|--------------|-----------|----------|-----------|--------------|
| Residue # | Amino acid         | Chemical shift ( $\delta$ ) |        |          |           |              |             |            |            |              |           |          |           |              |
| 1         | L - Leucine        | NH $\alpha$                 | CO     | $\alpha$ | $\beta$   | $\gamma$     | $\delta$    |            |            |              |           |          |           |              |
|           | 1H                 | 8.597                       | -      | 4.01     | 1.32      | 1.43         | 0.80/0.72   | -          | -          | -            | -         | -        | -         | -            |
|           | 13C/15N            | 126.00                      | 173.54 | 53.33    | 39.17     | 24.35        | 22.25/19.98 | -          | -          | -            | -         | -        | -         | -            |
| 2         | W - Tryptophan     | NH $\alpha$                 | CO     | $\alpha$ | $\beta$   | $\epsilon$ 1 | $\delta$ 1  | $\gamma$   | $\delta$ 2 | $\epsilon$ 3 | $\zeta$ 3 | $\eta$ 2 | $\zeta$ 2 | $\epsilon$ 2 |
|           | 1H                 | 7.45                        | -      | 4.70     | 3.09/3.13 | 10.01        | 7.10        | -          | -          | 7.49         | 7.07      | 7.19     | 7.43      | -            |
|           | 13C/15N            | 117.50                      | 172.00 | 53.34    | 28.21     | 129.07       | 124.68      | 108.88     | 127.14     | 118.34       | 119.17    | 121.87   | 113.01    | 136.17       |
| 3         | w - (R)-Tryptophan | NH $\alpha$                 | CO     | $\alpha$ | $\beta$   | $\epsilon$ 1 | $\delta$ 1  | $\gamma$   | $\delta$ 2 | $\epsilon$ 3 | $\zeta$ 3 | $\eta$ 2 | $\zeta$ 2 | $\epsilon$ 2 |
|           | 1H                 | 8.35                        | -      | 3.90     | 2.82/2.91 | 10.00        | 7.00        | -          | -          | 7.36         | 7.08      | 7.16     | 7.40      | -            |
|           | 13C/15N            | 126.00                      | 174.22 | 56.72    | 25.70     | 129.48       | 124.58      | 108.26     | 126.50     | 118.15       | 119.35    | 122.01   | 112.05    | 136.25       |
| 4         | N - Asparagine     | NH $\alpha$                 | CO     | $\alpha$ | $\beta$   | $\gamma$     | $\delta$ 2  |            |            |              |           |          |           |              |
|           | 1H                 | 7.68                        | -      | 4.28     | 1.70/2.36 | -            | 6.39/7.03   | -          | -          | -            | -         | -        | -         | -            |
|           | 13C/15N            | 124.00                      | 172.41 | 49.63    | 34.71     | 174.06       | 110.50      | -          | -          | -            | -         | -        | -         | -            |
| 5         | K - Lysine         | NH $\alpha$                 | CO     | $\alpha$ | $\beta$   | $\gamma$     | $\delta$    | $\epsilon$ | $\zeta$    |              |           |          |           |              |
|           | 1H                 | 7.67                        | -      | 4.33     | 1.52/1.72 | 1.24/1.15    | 1.52        | 2.86       | X          |              | -         | -        | -         | -            |
|           | 13C/15N            | 119.00                      | 172.23 | 52.56    | 31.03     | 21.62        | 26.24       | 39.49      | X          |              | -         | -        | -         | -            |
| 6         | r - (R)-Arginine   | NH $\alpha$                 | CO     | $\alpha$ | $\beta$   | $\gamma$     | $\delta$    | $\epsilon$ | $\zeta$    | $\eta$ 1     | $\eta$ 2  |          |           |              |
|           | 1H                 | 8.11                        | -      | 4.21     | 1.60      | 1.36/1.49    | 3.08        | 7.11       | -          | X            | X         | -        | -         | -            |
|           | 13C/15N            | 124.00                      | 174.05 | 53.66    | 27.34     | 24.51        | 40.61       | 84.49      | 156.81     | X            | X         | -        | -         | -            |
